# Supplementary material
Source: HighWire-hosted journal article supplement (http://www.ajnr.org/highwire/filestream/73360/field_highwire_adjunct_files/0/19-01033.pdf)
Supplement: 19-01033.pdf [file 19-01033.pdf]

**On-line Table 1: Characteristics of very preterm infants<sup>a</sup>**

| Characteristics                      | Low-Grade IVH (n = 16) | Control Subjects (n = 13) | P Value ( $\chi^2$ Test) |
|--------------------------------------|------------------------|---------------------------|--------------------------|
| Sex (male/female)                    | 7:9                    | 5:8                       |                          |
| GA (wk)                              | 28.8 ± 5.3             | 29.6 ± 4.1                | .15                      |
| Birth weight (g)                     | 1176.0 ± 466.5         | 1234.6 ± 190.9            | .40                      |
| Antenatal steroids                   | 7 (43.7)               | 8 (61.5)                  | .46                      |
| Mechanical ventilation >7 days       | 6 (37.5)               | 7 (53.8)                  | .38                      |
| Infection                            | 6 (37.5)               | 3 (23.1)                  | .40                      |
| Patent ductus arteriosus             | 5 (31.2)               | 2 (15.4)                  | .32                      |
| Chronic lung disease                 | 3 (18.7)               | 3 (23.1)                  | .77                      |
| Postmenstrual age at MR imaging (wk) | 42.4 ± 2.3             | 42.8 ± 1.8                | .54                      |
| Body weight at MR imaging (g)        | 3603.1 ± 644.4         | 3762.0 ± 626.5            | .54                      |

<sup>a</sup>Data are presented as means or No. (%).

**On-line Table 2: Comparison of the area distributions of the left hemisphere Brodmann atlas (PALSBI2) regions between the control subjects and very preterm infants with low-grade IVH**

| Brodmann Atlas (PALSBI2) Regions | Area (Left Hemisphere)           |                           |                                  |                                  |                           |                                  | P Value (Mann Whitney U Test) |
|----------------------------------|----------------------------------|---------------------------|----------------------------------|----------------------------------|---------------------------|----------------------------------|-------------------------------|
|                                  | Control Subjects                 |                           |                                  | IVH                              |                           |                                  |                               |
|                                  | Percentile 25 (mm <sup>2</sup> ) | Median (mm <sup>2</sup> ) | Percentile 75 (mm <sup>2</sup> ) | Percentile 25 (mm <sup>2</sup> ) | Median (mm <sup>2</sup> ) | Percentile 75 (mm <sup>2</sup> ) |                               |
| Brodmann 8                       | 672.0                            | 721.5                     | 752.0                            | 575.0                            | 648.0                     | 731.0                            | .200                          |
| Brodmann 6                       | 1438.0                           | 1711.5                    | 2204.0                           | 1301.0                           | 1566.0                    | 1675.0                           | .139                          |
| Brodmann 4                       | 1387.0                           | 1509.5                    | 1751.5                           | 1471.0                           | 1586.0                    | 1633.0                           | 1.000                         |
| Brodmann 9                       | 875.5                            | 966.5                     | 1066.5                           | 833.0                            | 930.0                     | 1086.0                           | .943                          |
| Brodmann 3                       | 364.5                            | 452.5                     | 532.5                            | 337.0                            | 396.0                     | 461.0                            | .236                          |
| Brodmann 1                       | 468.0                            | 560.0                     | 742.5                            | 428.0                            | 505.0                     | 578.0                            | .103                          |
| Brodmann 5                       | 480.0                            | 535.5                     | 597.5                            | 461.0                            | 524.0                     | 562.0                            | .683                          |
| Brodmann 7                       | 1792.0                           | 1992.0                    | 2763.5                           | 1507.0                           | 1713.0                    | 2024.0                           | .067                          |
| Brodmann 2                       | 911.5                            | 1008.0                    | 1291.5                           | 746.0                            | 868.0                     | 967.0                            | .025                          |
| Brodmann 31                      | 421.5                            | 456.0                     | 607.5                            | 465.0                            | 518.0                     | 589.0                            | .373                          |
| Brodmann 40                      | 834.5                            | 928.5                     | 1075.5                           | 699.0                            | 794.0                     | 921.0                            | .041                          |
| Brodmann 44                      | 307.5                            | 351.5                     | 504.0                            | 321.0                            | 406.0                     | 466.0                            | .648                          |
| Brodmann 45                      | 159.0                            | 206.5                     | 255.0                            | 147.0                            | 179.0                     | 214.0                            | .373                          |
| Brodmann 23                      | 181.0                            | 235.0                     | 262.5                            | 205.0                            | 213.0                     | 280.0                            | .905                          |
| Brodmann 39                      | 844.5                            | 899.0                     | 1157.5                           | 739.0                            | 841.0                     | 954.0                            | .114                          |
| Brodmann 43                      | 170.0                            | 212.0                     | 223.0                            | 172.0                            | 190.0                     | 224.0                            | .829                          |
| Brodmann 19                      | 1980.0                           | 2352.5                    | 3146.0                           | 1490.0                           | 1839.0                    | 2062.0                           | .001 <sup>a</sup>             |
| Brodmann 47                      | 93.0                             | 109.5                     | 136.0                            | 103.0                            | 116.0                     | 134.0                            | .581                          |
| Brodmann 41                      | 216.5                            | 260.0                     | 291.5                            | 244.0                            | 250.0                     | 316.0                            | .648                          |
| Brodmann 30                      | 45.0                             | 61.5                      | 88.0                             | 53.0                             | 61.0                      | 84.0                             | .981                          |
| Brodmann 22                      | 1228.0                           | 1640.0                    | 1909.5                           | 1279.0                           | 1422.0                    | 1652.0                           | .427                          |
| Brodmann 42                      | 302.0                            | 346.5                     | 453.0                            | 357.0                            | 417.0                     | 538.0                            | .236                          |
| Brodmann 21                      | 539.5                            | 634.0                     | 718.0                            | 458.0                            | 547.0                     | 595.0                            | .067                          |
| Brodmann 38                      | 542.0                            | 642.0                     | 726.0                            | 508.0                            | 561.0                     | 632.0                            | .083                          |
| Brodmann 37                      | 857.0                            | 917.0                     | 1600.5                           | 644.0                            | 829.0                     | 875.0                            | .007                          |
| Brodmann 20                      | 755.5                            | 868.5                     | 963.0                            | 734.0                            | 818.0                     | 854.0                            | .152                          |
| Brodmann 32                      | 522.0                            | 617.0                     | 692.5                            | 514.0                            | 583.0                     | 689.0                            | .792                          |
| Brodmann 24                      | 626.0                            | 740.5                     | 792.5                            | 617.0                            | 710.0                     | 747.0                            | .456                          |
| Brodmann 10                      | 822.0                            | 955.0                     | 1010.5                           | 761.0                            | 952.0                     | 1025.0                           | .905                          |
| Brodmann 25                      | 70.0                             | 106.0                     | 117.0                            | 77.0                             | 98.0                      | 105.0                            | .719                          |
| Brodmann 11                      | 742.5                            | 1021.5                    | 1122.0                           | 851.0                            | 1040.0                    | 1162.0                           | .548                          |
| Brodmann 46                      | 479.0                            | 594.5                     | 697.5                            | 500.0                            | 572.0                     | 630.0                            | .981                          |
| Brodmann 17                      | 588.0                            | 712.0                     | 824.5                            | 632.0                            | 710.0                     | 860.0                            | .581                          |
| Brodmann 18                      | 1407.0                           | 1718.0                    | 2064.0                           | 1332.0                           | 1434.0                    | 1787.0                           | .486                          |
| Brodmann 27                      | 39.0                             | 52.0                      | 61.5                             | 42.0                             | 48.0                      | 56.0                             | .981                          |
| Brodmann 36                      | 174.5                            | 210.0                     | 239.5                            | 185.0                            | 216.0                     | 253.0                            | .829                          |
| Brodmann 35                      | 39.0                             | 43.5                      | 50.0                             | 39.0                             | 44.0                      | 52.0                             | .981                          |
| Brodmann 28                      | 105.5                            | 128.5                     | 157.0                            | 101.0                            | 136.0                     | 156.0                            | .943                          |
| Brodmann 29                      | 14.0                             | 20.5                      | 21.5                             | 15.0                             | 19.0                      | 22.0                             | .981                          |
| Brodmann 26                      | 10.5                             | 14.5                      | 18.5                             | 12.0                             | 14.0                      | 15.0                             | .456                          |
| Medial wall                      | 1651.0                           | 1801.0                    | 2052.5                           | 1638.0                           | 1771.0                    | 1945.0                           | .399                          |
| Brodmann 33                      | 62.5                             | 68.0                      | 88.0                             | 51.0                             | 68.0                      | 77.0                             | .427                          |

<sup>a</sup>Significant difference ( $P \leq .001$ ).

**On-line Table 3: Comparison of the area distributions of the right hemisphere Brodmann atlas (PALSBI2) regions between the control subjects and the very preterm infants with low-grade IVH**

| Brodmann Atlas (PALSBI2) Regions | Area (Right Hemisphere)          |                           |                                  |                                  |                           |                                  | P Value (Mann Whitney U Test) |
|----------------------------------|----------------------------------|---------------------------|----------------------------------|----------------------------------|---------------------------|----------------------------------|-------------------------------|
|                                  | Control Subjects                 |                           |                                  | IVH                              |                           |                                  |                               |
|                                  | Percentile 25 (mm <sup>2</sup> ) | Median (mm <sup>2</sup> ) | Percentile 75 (mm <sup>2</sup> ) | Percentile 25 (mm <sup>2</sup> ) | Median (mm <sup>2</sup> ) | Percentile 75 (mm <sup>2</sup> ) |                               |
| Brodmann 8                       | 808.5                            | 920.0                     | 1031.5                           | 680.0                            | 774.0                     | 848.0                            | .009                          |
| Brodmann 6                       | 1512.0                           | 1617.5                    | 1719.5                           | 1242.0                           | 1424.0                    | 1540.0                           | .012                          |
| Brodmann 4                       | 1450.5                           | 1636.5                    | 2085.5                           | 1366.0                           | 1475.0                    | 1699.0                           | .152                          |
| Brodmann 9                       | 1064.5                           | 1213.5                    | 1348.0                           | 868.0                            | 973.0                     | 1051.0                           | .001 <sup>a</sup>             |
| Brodmann 3                       | 375.5                            | 433.5                     | 474.0                            | 361.0                            | 411.0                     | 467.0                            | .486                          |
| Brodmann 1                       | 404.0                            | 514.5                     | 642.5                            | 425.0                            | 495.0                     | 693.0                            | .981                          |
| Brodmann 5                       | 439.5                            | 507.5                     | 614.0                            | 395.0                            | 459.0                     | 507.0                            | .152                          |
| Brodmann 7                       | 1507.5                           | 1629.0                    | 1907.5                           | 1239.0                           | 1455.0                    | 1587.0                           | .021                          |
| Brodmann 2                       | 701.0                            | 773.0                     | 1016.0                           | 610.0                            | 804.0                     | 834.0                            | .236                          |
| Brodmann 31                      | 532.5                            | 598.5                     | 682.5                            | 478.0                            | 580.0                     | 705.0                            | .792                          |
| Brodmann 40                      | 712.5                            | 814.0                     | 998.0                            | 627.0                            | 732.0                     | 830.0                            | .103                          |
| Brodmann 44                      | 465.5                            | 515.5                     | 553.5                            | 289.0                            | 394.0                     | 455.0                            | .005                          |
| Brodmann 45                      | 253.0                            | 291.0                     | 347.0                            | 168.0                            | 207.0                     | 219.0                            | .001 <sup>a</sup>             |
| Brodmann 23                      | 259.5                            | 341.0                     | 403.5                            | 243.0                            | 307.0                     | 363.0                            | .427                          |
| Brodmann 39                      | 694.0                            | 778.0                     | 871.5                            | 638.0                            | 732.0                     | 831.0                            | .200                          |
| Brodmann 43                      | 214.5                            | 291.0                     | 304.5                            | 216.0                            | 260.0                     | 333.0                            | .943                          |
| Brodmann 19                      | 2136.0                           | 2451.5                    | 2797.0                           | 1868.0                           | 2152.0                    | 2388.0                           | .037                          |
| Brodmann 47                      | 181.5                            | 197.0                     | 250.5                            | 151.0                            | 178.0                     | 204.0                            | .126                          |
| Brodmann 41                      | 182.0                            | 232.5                     | 285.5                            | 176.0                            | 254.0                     | 283.0                            | .755                          |
| Brodmann 30                      | 67.0                             | 89.0                      | 109.0                            | 80.0                             | 96.0                      | 107.0                            | .399                          |
| Brodmann 22                      | 1184.0                           | 1447.0                    | 1593.0                           | 1202.0                           | 1421.0                    | 1507.0                           | .719                          |
| Brodmann 42                      | 296.5                            | 361.0                     | 540.5                            | 326.0                            | 398.0                     | 422.0                            | .755                          |
| Brodmann 21                      | 497.0                            | 599.0                     | 688.0                            | 481.0                            | 570.0                     | 673.0                            | .867                          |
| Brodmann 38                      | 606.0                            | 721.5                     | 835.5                            | 643.0                            | 694.0                     | 753.0                            | .905                          |
| Brodmann 37                      | 1058.0                           | 1110.5                    | 1200.0                           | 840.0                            | 1049.0                    | 1067.0                           | .032                          |
| Brodmann 20                      | 775.0                            | 835.0                     | 888.5                            | 722.0                            | 833.0                     | 911.0                            | .792                          |
| Brodmann 32                      | 565.5                            | 638.0                     | 746.0                            | 519.0                            | 586.0                     | 632.0                            | .103                          |
| Brodmann 24                      | 694.5                            | 751.0                     | 847.5                            | 589.0                            | 700.0                     | 762.0                            | .183                          |
| Brodmann 10                      | 953.5                            | 1063.0                    | 1183.0                           | 791.0                            | 964.0                     | 992.0                            | .025                          |
| Brodmann 25                      | 92.5                             | 97.0                      | 102.0                            | 80.0                             | 99.0                      | 120.0                            | .867                          |
| Brodmann 11                      | 1181.5                           | 1377.5                    | 1430.5                           | 1039.0                           | 1222.0                    | 1362.0                           | .139                          |
| Brodmann 46                      | 580.5                            | 714.5                     | 837.0                            | 434.0                            | 531.0                     | 656.0                            | .012                          |
| Brodmann 17                      | 423.0                            | 516.5                     | 723.5                            | 508.0                            | 585.0                     | 652.0                            | .792                          |
| Brodmann 18                      | 1232.0                           | 1687.0                    | 1752.0                           | 1175.0                           | 1317.0                    | 1413.0                           | .236                          |
| Brodmann 27                      | 36.5                             | 50.0                      | 58.0                             | 37.0                             | 48.0                      | 65.0                             | .829                          |
| Brodmann 36                      | 225.0                            | 248.0                     | 265.5                            | 219.0                            | 232.0                     | 247.0                            | .277                          |
| Brodmann 35                      | 37.0                             | 46.0                      | 56.0                             | 41.0                             | 47.0                      | 53.0                             | .792                          |
| Brodmann 28                      | 93.5                             | 128.5                     | 155.5                            | 117.0                            | 134.0                     | 148.0                            | .683                          |
| Brodmann 29                      | 21.0                             | 23.0                      | 27.0                             | 24.0                             | 26.0                      | 31.0                             | .236                          |
| Brodmann 26                      | 13.0                             | 17.0                      | 20.5                             | 12.0                             | 12.0                      | 19.0                             | .277                          |
| Medial wall                      | 1883.5                           | 1950.5                    | 2063.0                           | 1759.0                           | 1916.0                    | 2044.0                           | .581                          |

<sup>a</sup>Significant difference ( $P \leq .001$ ).

**On-line Table 4: Comparison of the mean curvature distributions of the left hemisphere Brodmann atlas (PALSBI2) regions between the control subjects and the very preterm infants with low-grade IVH<sup>a</sup>**

| Brodmann Atlas (PALSBI2) Regions | Mean Curvature (Left Hemisphere)  |                            |                                   |                                   |                            |                                   | P Value (Mann Whitney U Test) |
|----------------------------------|-----------------------------------|----------------------------|-----------------------------------|-----------------------------------|----------------------------|-----------------------------------|-------------------------------|
|                                  | Control Subjects                  |                            |                                   | IVH                               |                            |                                   |                               |
|                                  | Percentile 25 (mm <sup>-1</sup> ) | Median (mm <sup>-1</sup> ) | Percentile 75 (mm <sup>-1</sup> ) | Percentile 25 (mm <sup>-1</sup> ) | Median (mm <sup>-1</sup> ) | Percentile 75 (mm <sup>-1</sup> ) |                               |
| Brodmann 8                       | 0.119                             | 0.123                      | 0.135                             | 0.117                             | 0.125                      | 0.130                             | .648                          |
| Brodmann 6                       | 0.118                             | 0.124                      | 0.130                             | 0.118                             | 0.131                      | 0.136                             | .139                          |
| Brodmann 4                       | 0.116                             | 0.124                      | 0.130                             | 0.120                             | 0.124                      | 0.131                             | .581                          |
| Brodmann 9                       | 0.115                             | 0.124                      | 0.133                             | 0.125                             | 0.131                      | 0.137                             | .114                          |
| Brodmann 3                       | 0.110                             | 0.118                      | 0.124                             | 0.103                             | 0.112                      | 0.122                             | .486                          |
| Brodmann 1                       | 0.120                             | 0.124                      | 0.131                             | 0.117                             | 0.127                      | 0.135                             | .486                          |
| Brodmann 5                       | 0.122                             | 0.129                      | 0.142                             | 0.128                             | 0.134                      | 0.141                             | .516                          |
| Brodmann 7                       | 0.117                             | 0.131                      | 0.135                             | 0.128                             | 0.133                      | 0.139                             | .152                          |
| Brodmann 2                       | 0.113                             | 0.121                      | 0.127                             | 0.128                             | 0.130                      | 0.137                             | .005                          |
| Brodmann 31                      | 0.114                             | 0.122                      | 0.134                             | 0.128                             | 0.137                      | 0.145                             | .053                          |
| Brodmann 40                      | 0.119                             | 0.127                      | 0.137                             | 0.122                             | 0.132                      | 0.137                             | .516                          |
| Brodmann 44                      | 0.107                             | 0.124                      | 0.132                             | 0.123                             | 0.128                      | 0.135                             | .217                          |
| Brodmann 45                      | 0.117                             | 0.127                      | 0.134                             | 0.119                             | 0.133                      | 0.137                             | .347                          |
| Brodmann 23                      | 0.097                             | 0.111                      | 0.138                             | 0.114                             | 0.126                      | 0.137                             | .236                          |
| Brodmann 39                      | 0.119                             | 0.126                      | 0.132                             | 0.132                             | 0.135                      | 0.140                             | .016                          |
| Brodmann 43                      | 0.117                             | 0.127                      | 0.142                             | 0.119                             | 0.134                      | 0.142                             | .683                          |
| Brodmann 19                      | 0.127                             | 0.134                      | 0.140                             | 0.129                             | 0.132                      | 0.135                             | .486                          |
| Brodmann 47                      | 0.111                             | 0.125                      | 0.137                             | 0.120                             | 0.140                      | 0.148                             | .114                          |
| Brodmann 41                      | 0.119                             | 0.130                      | 0.142                             | 0.115                             | 0.123                      | 0.135                             | .217                          |
| Brodmann 30                      | 0.103                             | 0.127                      | 0.148                             | 0.095                             | 0.120                      | 0.155                             | .683                          |
| Brodmann 22                      | 0.117                             | 0.127                      | 0.135                             | 0.124                             | 0.131                      | 0.139                             | .126                          |
| Brodmann 42                      | 0.112                             | 0.122                      | 0.142                             | 0.098                             | 0.117                      | 0.121                             | .139                          |
| Brodmann 21                      | 0.110                             | 0.133                      | 0.139                             | 0.116                             | 0.121                      | 0.135                             | .905                          |
| Brodmann 38                      | 0.114                             | 0.120                      | 0.129                             | 0.113                             | 0.116                      | 0.122                             | .200                          |
| Brodmann 37                      | 0.130                             | 0.135                      | 0.140                             | 0.129                             | 0.137                      | 0.142                             | .581                          |
| Brodmann 20                      | 0.109                             | 0.129                      | 0.133                             | 0.118                             | 0.121                      | 0.129                             | .867                          |
| Brodmann 32                      | 0.103                             | 0.120                      | 0.132                             | 0.120                             | 0.127                      | 0.136                             | .103                          |
| Brodmann 24                      | 0.111                             | 0.121                      | 0.137                             | 0.111                             | 0.126                      | 0.130                             | .792                          |
| Brodmann 10                      | 0.115                             | 0.125                      | 0.133                             | 0.122                             | 0.131                      | 0.135                             | .139                          |
| Brodmann 25                      | 0.096                             | 0.126                      | 0.154                             | 0.118                             | 0.125                      | 0.136                             | .981                          |
| Brodmann 11                      | 0.107                             | 0.124                      | 0.129                             | 0.120                             | 0.123                      | 0.131                             | .399                          |
| Brodmann 46                      | 0.118                             | 0.125                      | 0.132                             | 0.125                             | 0.133                      | 0.142                             | .037                          |
| Brodmann 17                      | 0.114                             | 0.132                      | 0.135                             | 0.107                             | 0.112                      | 0.122                             | .059                          |
| Brodmann 18                      | 0.121                             | 0.126                      | 0.132                             | 0.126                             | 0.131                      | 0.144                             | .037                          |
| Brodmann 27                      | 0.095                             | 0.112                      | 0.137                             | 0.096                             | 0.109                      | 0.132                             | .905                          |
| Brodmann 36                      | 0.103                             | 0.120                      | 0.130                             | 0.123                             | 0.133                      | 0.146                             | .047                          |
| Brodmann 35                      | 0.086                             | 0.104                      | 0.116                             | 0.084                             | 0.107                      | 0.131                             | .516                          |
| Brodmann 28                      | 0.105                             | 0.111                      | 0.118                             | 0.099                             | 0.115                      | 0.129                             | .614                          |
| Brodmann 29                      | 0.093                             | 0.112                      | 0.142                             | 0.082                             | 0.094                      | 0.147                             | .373                          |
| Brodmann 26                      | 0.089                             | 0.114                      | 0.143                             | 0.077                             | 0.098                      | 0.138                             | .373                          |
| Medial wall                      | 0.098                             | 0.104                      | 0.111                             | 0.092                             | 0.094                      | 0.099                             | .005                          |
| Brodmann 33                      | 0.101                             | 0.126                      | 0.145                             | 0.095                             | 0.127                      | 0.141                             | .981                          |

<sup>a</sup> Significant differences ( $P \leq .001$ ) were not detected.

**On-line Table 5: Comparison of the mean curvature distributions of the right hemisphere Brodmann atlas (PALSBI2) regions between the control subjects and the very preterm infants with low-grade IVH<sup>a</sup>**

| Brodmann Atlas (PALSBI2) Regions | Mean Curvature (Right Hemisphere) |                            |                                   |                                   |                            |                                   | P Value (Mann Whitney U Test) |
|----------------------------------|-----------------------------------|----------------------------|-----------------------------------|-----------------------------------|----------------------------|-----------------------------------|-------------------------------|
|                                  | Control Subjects                  |                            |                                   | IVH                               |                            |                                   |                               |
|                                  | Percentile 25 (mm <sup>-1</sup> ) | Median (mm <sup>-1</sup> ) | Percentile 75 (mm <sup>-1</sup> ) | Percentile 25 (mm <sup>-1</sup> ) | Median (mm <sup>-1</sup> ) | Percentile 75 (mm <sup>-1</sup> ) |                               |
| Brodmann 8                       | 0.118                             | 0.123                      | 0.127                             | 0.119                             | 0.123                      | 0.130                             | .867                          |
| Brodmann 6                       | 0.120                             | 0.128                      | 0.132                             | 0.124                             | 0.131                      | 0.135                             | .277                          |
| Brodmann 4                       | 0.118                             | 0.122                      | 0.127                             | 0.120                             | 0.127                      | 0.132                             | .152                          |
| Brodmann 9                       | 0.122                             | 0.132                      | 0.137                             | 0.119                             | 0.126                      | 0.139                             | .792                          |
| Brodmann 3                       | 0.100                             | 0.118                      | 0.127                             | 0.109                             | 0.121                      | 0.127                             | .399                          |
| Brodmann 1                       | 0.109                             | 0.121                      | 0.133                             | 0.114                             | 0.121                      | 0.133                             | .719                          |
| Brodmann 5                       | 0.123                             | 0.130                      | 0.138                             | 0.133                             | 0.142                      | 0.150                             | .053                          |
| Brodmann 7                       | 0.122                             | 0.131                      | 0.143                             | 0.131                             | 0.134                      | 0.139                             | .427                          |
| Brodmann 2                       | 0.112                             | 0.126                      | 0.134                             | 0.122                             | 0.129                      | 0.137                             | .456                          |
| Brodmann 31                      | 0.114                             | 0.125                      | 0.139                             | 0.131                             | 0.136                      | 0.148                             | .067                          |
| Brodmann 40                      | 0.113                             | 0.130                      | 0.140                             | 0.128                             | 0.133                      | 0.143                             | .167                          |
| Brodmann 44                      | 0.118                             | 0.127                      | 0.132                             | 0.115                             | 0.130                      | 0.137                             | .581                          |
| Brodmann 45                      | 0.124                             | 0.133                      | 0.141                             | 0.108                             | 0.122                      | 0.132                             | .093                          |
| Brodmann 23                      | 0.118                             | 0.133                      | 0.143                             | 0.119                             | 0.127                      | 0.141                             | .719                          |
| Brodmann 39                      | 0.119                             | 0.125                      | 0.134                             | 0.128                             | 0.137                      | 0.144                             | .067                          |
| Brodmann 43                      | 0.106                             | 0.132                      | 0.148                             | 0.116                             | 0.127                      | 0.132                             | .516                          |
| Brodmann 19                      | 0.123                             | 0.127                      | 0.135                             | 0.132                             | 0.134                      | 0.140                             | .025                          |
| Brodmann 47                      | 0.128                             | 0.144                      | 0.150                             | 0.120                             | 0.128                      | 0.149                             | .347                          |
| Brodmann 41                      | 0.123                             | 0.125                      | 0.139                             | 0.116                             | 0.129                      | 0.139                             | .581                          |
| Brodmann 30                      | 0.109                             | 0.121                      | 0.136                             | 0.114                             | 0.124                      | 0.135                             | .943                          |
| Brodmann 22                      | 0.123                             | 0.128                      | 0.130                             | 0.125                             | 0.130                      | 0.134                             | .126                          |
| Brodmann 42                      | 0.107                             | 0.121                      | 0.142                             | 0.115                             | 0.119                      | 0.131                             | .829                          |
| Brodmann 21                      | 0.122                             | 0.128                      | 0.134                             | 0.107                             | 0.129                      | 0.136                             | .905                          |
| Brodmann 38                      | 0.120                             | 0.125                      | 0.134                             | 0.123                             | 0.124                      | 0.131                             | .719                          |
| Brodmann 37                      | 0.125                             | 0.132                      | 0.142                             | 0.138                             | 0.139                      | 0.149                             | .114                          |
| Brodmann 20                      | 0.125                             | 0.129                      | 0.142                             | 0.117                             | 0.124                      | 0.131                             | .167                          |
| Brodmann 32                      | 0.122                             | 0.131                      | 0.135                             | 0.122                             | 0.129                      | 0.134                             | .943                          |
| Brodmann 24                      | 0.114                             | 0.128                      | 0.134                             | 0.119                             | 0.126                      | 0.140                             | .300                          |
| Brodmann 10                      | 0.114                             | 0.127                      | 0.132                             | 0.120                             | 0.136                      | 0.140                             | .093                          |
| Brodmann 25                      | 0.109                             | 0.121                      | 0.133                             | 0.098                             | 0.123                      | 0.142                             | .867                          |
| Brodmann 11                      | 0.119                             | 0.126                      | 0.132                             | 0.122                             | 0.131                      | 0.138                             | .236                          |
| Brodmann 46                      | 0.128                             | 0.132                      | 0.137                             | 0.124                             | 0.137                      | 0.144                             | .399                          |
| Brodmann 17                      | 0.104                             | 0.116                      | 0.121                             | 0.110                             | 0.120                      | 0.123                             | .427                          |
| Brodmann 18                      | 0.120                             | 0.133                      | 0.137                             | 0.124                             | 0.133                      | 0.138                             | .486                          |
| Brodmann 27                      | 0.087                             | 0.120                      | 0.141                             | 0.103                             | 0.139                      | 0.145                             | .486                          |
| Brodmann 36                      | 0.112                             | 0.118                      | 0.132                             | 0.110                             | 0.120                      | 0.131                             | .829                          |
| Brodmann 35                      | 0.090                             | 0.109                      | 0.138                             | 0.111                             | 0.127                      | 0.156                             | .217                          |
| Brodmann 28                      | 0.104                             | 0.122                      | 0.136                             | 0.103                             | 0.117                      | 0.135                             | .867                          |
| Brodmann 29                      | 0.075                             | 0.119                      | 0.138                             | 0.081                             | 0.109                      | 0.129                             | .648                          |
| Brodmann 26                      | 0.085                             | 0.142                      | 0.177                             | 0.077                             | 0.106                      | 0.118                             | .103                          |
| Medial wall                      | 0.105                             | 0.107                      | 0.112                             | 0.104                             | 0.108                      | 0.111                             | .943                          |

<sup>a</sup>Significant differences ( $P \leq .001$ ) were not detected.

**On-line Table 6: Comparison of the thickness distributions of the left hemisphere Brodmann atlas (PALSBI2) regions between the control subjects and the very preterm infants with low-grade IVH<sup>a</sup>**

| Brodmann Atlas (PALSBI2) Regions | Thickness (Left Hemisphere) |             |                    |                    |             |                    | P Value (Mann Whitney U Test) |
|----------------------------------|-----------------------------|-------------|--------------------|--------------------|-------------|--------------------|-------------------------------|
|                                  | Controls                    |             |                    | IVH                |             |                    |                               |
|                                  | Percentile 25 (mm)          | Median (mm) | Percentile 75 (mm) | Percentile 25 (mm) | Median (mm) | Percentile 75 (mm) |                               |
| Brodmann 8                       | 2.198                       | 2.355       | 2.553              | 2.225              | 2.399       | 2.623              | .648                          |
| Brodmann 6                       | 1.996                       | 2.161       | 2.257              | 2.126              | 2.248       | 2.328              | .236                          |
| Brodmann 4                       | 2.053                       | 2.593       | 2.675              | 2.583              | 2.641       | 2.687              | .183                          |
| Brodmann 9                       | 2.281                       | 2.477       | 2.795              | 2.293              | 2.507       | 2.584              | .683                          |
| Brodmann 3                       | 2.298                       | 2.620       | 2.889              | 2.553              | 2.812       | 3.131              | .152                          |
| Brodmann 1                       | 2.324                       | 2.388       | 2.605              | 2.600              | 2.770       | 2.930              | .002                          |
| Brodmann 5                       | 1.494                       | 2.359       | 2.702              | 2.219              | 2.374       | 2.685              | .548                          |
| Brodmann 7                       | 2.040                       | 2.413       | 2.915              | 2.418              | 2.518       | 2.631              | .277                          |
| Brodmann 2                       | 2.242                       | 2.456       | 2.839              | 2.306              | 2.494       | 2.540              | 1.00                          |
| Brodmann 31                      | 2.117                       | 2.599       | 2.799              | 2.344              | 2.550       | 2.882              | .755                          |
| Brodmann 40                      | 2.521                       | 2.651       | 2.778              | 2.527              | 2.740       | 3.018              | .456                          |
| Brodmann 44                      | 2.111                       | 2.305       | 2.708              | 2.097              | 2.366       | 2.518              | .943                          |
| Brodmann 45                      | 1.833                       | 2.397       | 2.731              | 2.185              | 2.401       | 2.625              | .981                          |
| Brodmann 23                      | 0.434                       | 1.800       | 2.390              | 1.046              | 2.248       | 2.937              | .083                          |
| Brodmann 39                      | 2.366                       | 2.524       | 2.881              | 2.454              | 2.661       | 2.901              | .614                          |
| Brodmann 43                      | 2.026                       | 2.528       | 2.830              | 2.449              | 2.615       | 2.798              | .427                          |
| Brodmann 19                      | 2.157                       | 2.478       | 2.903              | 2.456              | 2.697       | 2.800              | .236                          |
| Brodmann 47                      | 1.999                       | 2.369       | 2.983              | 2.255              | 2.549       | 2.762              | .516                          |
| Brodmann 41                      | 1.613                       | 2.353       | 2.649              | 2.453              | 2.643       | 2.754              | .059                          |
| Brodmann 30                      | 0.418                       | 1.541       | 2.849              | 1.253              | 2.919       | 3.727              | .075                          |
| Brodmann 22                      | 2.376                       | 2.506       | 2.846              | 2.426              | 2.478       | 2.746              | .867                          |
| Brodmann 42                      | 1.443                       | 2.677       | 2.996              | 2.434              | 2.726       | 3.084              | .373                          |
| Brodmann 21                      | 2.102                       | 2.611       | 2.751              | 2.204              | 2.380       | 2.648              | .755                          |
| Brodmann 38                      | 1.601                       | 2.052       | 2.257              | 1.957              | 2.163       | 2.302              | .373                          |
| Brodmann 37                      | 2.134                       | 2.353       | 2.903              | 2.431              | 2.560       | 2.824              | .399                          |
| Brodmann 20                      | 1.603                       | 1.904       | 2.171              | 1.862              | 1.940       | 2.306              | .323                          |
| Brodmann 32                      | 1.738                       | 2.314       | 2.765              | 2.616              | 2.834       | 3.133              | .037                          |
| Brodmann 24                      | 1.345                       | 2.226       | 2.529              | 2.470              | 2.534       | 2.981              | .019                          |
| Brodmann 10                      | 2.045                       | 2.283       | 2.491              | 2.193              | 2.466       | 2.555              | .236                          |
| Brodmann 25                      | 1.089                       | 2.214       | 2.555              | 2.154              | 2.529       | 2.693              | .083                          |
| Brodmann 11                      | 1.692                       | 2.233       | 2.628              | 2.232              | 2.313       | 2.465              | .648                          |
| Brodmann 46                      | 1.927                       | 2.450       | 2.755              | 2.433              | 2.593       | 2.771              | .300                          |
| Brodmann 17                      | 2.200                       | 2.917       | 3.139              | 2.849              | 3.062       | 3.636              | .067                          |
| Brodmann 18                      | 2.260                       | 2.574       | 2.827              | 2.496              | 2.638       | 2.943              | .456                          |
| Brodmann 27                      | 0.361                       | 1.190       | 2.057              | 0.631              | 1.634       | 1.998              | .347                          |
| Brodmann 36                      | 0.605                       | 1.254       | 1.569              | 1.068              | 1.377       | 1.738              | .399                          |
| Brodmann 35                      | 0.405                       | 1.594       | 2.356              | 1.080              | 2.221       | 2.696              | .217                          |
| Brodmann 28                      | 0.324                       | 0.627       | 0.938              | 0.398              | 0.658       | 0.841              | .867                          |
| Brodmann 29                      | 0.343                       | 0.679       | 1.991              | 0.610              | 2.490       | 3.085              | .075                          |
| Brodmann 26                      | 0.287                       | 0.642       | 2.175              | 0.417              | 2.047       | 3.041              | .075                          |
| Medial wall                      | 0.334                       | 0.673       | 0.826              | 0.564              | 0.627       | 0.709              | .719                          |
| Brodmann 33                      | 0.842                       | 2.475       | 2.691              | 2.597              | 2.891       | 3.251              | .004                          |

<sup>a</sup> Significant differences ( $P \leq .001$ ) were not detected.

**On-line Table 7: Comparison of the thickness distributions of the right hemisphere Brodmann atlas (PALSBI2) regions between the control subjects and the very preterm infants with low-grade IVH<sup>a</sup>**

| Brodmann Atlas (PALSBI2) Regions | Thickness (Right Hemisphere) |             |                    |                    |             |                    | P Value (Mann Whitney U Test) |
|----------------------------------|------------------------------|-------------|--------------------|--------------------|-------------|--------------------|-------------------------------|
|                                  | Control Subjects             |             |                    | IVH                |             |                    |                               |
|                                  | Percentile 25 (mm)           | Median (mm) | Percentile 75 (mm) | Percentile 25 (mm) | Median (mm) | Percentile 75 (mm) |                               |
| Brodmann 8                       | 2.117                        | 2.325       | 2.398              | 2.268              | 2.408       | 2.508              | .126                          |
| Brodmann 6                       | 2.145                        | 2.273       | 2.361              | 2.111              | 2.178       | 2.270              | .548                          |
| Brodmann 4                       | 2.106                        | 2.636       | 2.797              | 2.484              | 2.611       | 2.687              | .905                          |
| Brodmann 9                       | 2.422                        | 2.589       | 2.711              | 2.196              | 2.488       | 2.864              | .867                          |
| Brodmann 3                       | 2.196                        | 2.701       | 2.989              | 2.689              | 2.852       | 3.006              | .236                          |
| Brodmann 1                       | 2.443                        | 2.747       | 3.008              | 2.475              | 2.676       | 2.887              | .581                          |
| Brodmann 5                       | 2.176                        | 2.349       | 2.508              | 2.258              | 2.418       | 2.632              | .323                          |
| Brodmann 7                       | 2.318                        | 2.462       | 2.690              | 2.493              | 2.621       | 2.715              | .093                          |
| Brodmann 2                       | 2.277                        | 2.581       | 3.096              | 2.331              | 2.489       | 2.691              | .792                          |
| Brodmann 31                      | 1.796                        | 2.337       | 2.596              | 2.265              | 2.405       | 2.624              | .347                          |
| Brodmann 40                      | 2.296                        | 2.420       | 2.740              | 2.329              | 2.526       | 2.688              | .792                          |
| Brodmann 44                      | 2.134                        | 2.327       | 2.452              | 2.067              | 2.242       | 2.414              | .792                          |
| Brodmann 45                      | 2.233                        | 2.427       | 2.571              | 2.181              | 2.469       | 2.548              | .867                          |
| Brodmann 23                      | 0.927                        | 1.849       | 2.366              | 1.689              | 2.267       | 2.898              | .114                          |
| Brodmann 39                      | 2.505                        | 2.806       | 2.962              | 2.593              | 2.744       | 2.827              | .792                          |
| Brodmann 43                      | 2.363                        | 2.677       | 2.954              | 2.380              | 2.477       | 2.596              | .277                          |
| Brodmann 19                      | 2.360                        | 2.550       | 2.835              | 2.613              | 2.744       | 2.940              | .183                          |
| Brodmann 47                      | 2.132                        | 2.334       | 2.439              | 2.142              | 2.372       | 2.569              | .548                          |
| Brodmann 41                      | 2.178                        | 2.586       | 2.751              | 2.408              | 2.557       | 2.782              | .905                          |
| Brodmann 30                      | 0.941                        | 1.636       | 3.031              | 1.794              | 2.922       | 3.292              | .217                          |
| Brodmann 22                      | 2.241                        | 2.402       | 2.730              | 2.144              | 2.458       | 2.752              | .905                          |
| Brodmann 42                      | 1.862                        | 2.551       | 3.032              | 2.320              | 2.758       | 2.899              | .581                          |
| Brodmann 21                      | 1.665                        | 2.439       | 2.941              | 2.367              | 2.585       | 2.676              | .648                          |
| Brodmann 38                      | 1.774                        | 2.168       | 2.364              | 2.202              | 2.291       | 2.325              | .456                          |
| Brodmann 37                      | 1.826                        | 2.167       | 2.446              | 2.363              | 2.454       | 2.662              | .016                          |
| Brodmann 20                      | 1.108                        | 2.001       | 2.307              | 1.831              | 2.059       | 2.272              | .347                          |
| Brodmann 32                      | 2.012                        | 2.365       | 2.587              | 2.434              | 2.579       | 2.838              | .114                          |
| Brodmann 24                      | 1.724                        | 2.093       | 2.309              | 2.086              | 2.332       | 2.502              | .067                          |
| Brodmann 10                      | 2.381                        | 2.652       | 2.902              | 2.285              | 2.477       | 2.536              | .093                          |
| Brodmann 25                      | 1.769                        | 2.274       | 2.541              | 2.031              | 2.464       | 2.887              | .103                          |
| Brodmann 11                      | 2.417                        | 2.545       | 2.717              | 2.375              | 2.458       | 2.761              | .648                          |
| Brodmann 46                      | 2.330                        | 2.479       | 2.644              | 2.340              | 2.489       | 2.572              | .867                          |
| Brodmann 17                      | 2.366                        | 2.723       | 3.403              | 2.888              | 3.000       | 3.095              | .614                          |
| Brodmann 18                      | 2.172                        | 2.571       | 3.006              | 2.575              | 2.848       | 3.168              | .139                          |
| Brodmann 27                      | 0.463                        | 1.741       | 2.101              | 1.256              | 1.953       | 2.426              | .256                          |
| Brodmann 36                      | 0.782                        | 1.039       | 1.297              | 0.905              | 1.097       | 1.373              | .648                          |
| Brodmann 35                      | 0.527                        | 2.050       | 2.459              | 1.563              | 2.265       | 2.462              | .456                          |
| Brodmann 28                      | 0.295                        | 0.564       | 0.775              | 0.623              | 0.678       | 0.813              | .236                          |
| Brodmann 29                      | 0.377                        | 1.160       | 2.156              | 1.440              | 1.976       | 3.037              | .256                          |
| Brodmann 26                      | 0.402                        | 0.703       | 2.149              | 0.772              | 1.890       | 2.193              | .486                          |
| Medial wall                      | 0.352                        | 0.545       | 0.640              | 0.444              | 0.498       | 0.566              | .683                          |

<sup>a</sup>Significant differences ( $P \leq .001$ ) were not detected.

**On-line Table 8: Comparison of the volume distributions of the left hemisphere Brodmann atlas (PALSBI2) regions between the control subjects and the very preterm infants with low-grade IVH<sup>a</sup>**

| Brodmann Atlas (PALSBI2) Regions | Volume (Left Hemisphere)         |                           |                                  |                                  |                           |                                  | P Value (Mann Whitney U Test) |
|----------------------------------|----------------------------------|---------------------------|----------------------------------|----------------------------------|---------------------------|----------------------------------|-------------------------------|
|                                  | Control Subjects                 |                           |                                  | IVH                              |                           |                                  |                               |
|                                  | Percentile 25 (mm <sup>3</sup> ) | Median (mm <sup>3</sup> ) | Percentile 75 (mm <sup>3</sup> ) | Percentile 25 (mm <sup>3</sup> ) | Median (mm <sup>3</sup> ) | Percentile 75 (mm <sup>3</sup> ) |                               |
| Brodmann 8                       | 1619.5                           | 1819.5                    | 1905.0                           | 1388.0                           | 1575.0                    | 1725.0                           | .103                          |
| Brodmann 6                       | 3087.0                           | 3575.0                    | 4019.5                           | 2871.0                           | 3454.0                    | 3771.0                           | .486                          |
| Brodmann 4                       | 3175.5                           | 3818.0                    | 5119.5                           | 4136.0                           | 4605.0                    | 4923.0                           | .256                          |
| Brodmann 9                       | 2009.0                           | 2577.5                    | 2987.0                           | 1860.0                           | 2591.0                    | 3087.0                           | .867                          |
| Brodmann 3                       | 769.0                            | 920.0                     | 1427.5                           | 817.0                            | 1049.0                    | 1113.0                           | .905                          |
| Brodmann 1                       | 1195.0                           | 1628.0                    | 2259.5                           | 1408.0                           | 1725.0                    | 1845.0                           | 1.000                         |
| Brodmann 5                       | 867.0                            | 1247.5                    | 1523.0                           | 1142.0                           | 1280.0                    | 1559.0                           | .323                          |
| Brodmann 7                       | 4813.5                           | 5614.0                    | 7219.5                           | 4169.0                           | 4889.0                    | 5627.0                           | .277                          |
| Brodmann 2                       | 2315.5                           | 2762.0                    | 3197.0                           | 2147.0                           | 2378.0                    | 2826.0                           | .200                          |
| Brodmann 31                      | 958.5                            | 1111.0                    | 1468.0                           | 1105.0                           | 1250.0                    | 1491.0                           | .236                          |
| Brodmann 40                      | 2443.0                           | 2957.0                    | 3448.0                           | 2358.0                           | 2419.0                    | 2658.0                           | .114                          |
| Brodmann 44                      | 573.5                            | 788.5                     | 1024.0                           | 743.0                            | 825.0                     | 1116.0                           | .323                          |
| Brodmann 45                      | 362.5                            | 454.5                     | 599.0                            | 415.0                            | 458.0                     | 594.0                            | .581                          |
| Brodmann 23                      | 62.5                             | 419.5                     | 637.5                            | 253.0                            | 593.0                     | 722.0                            | .167                          |
| Brodmann 39                      | 2078.0                           | 2603.0                    | 3298.0                           | 1962.0                           | 2401.0                    | 2801.0                           | .427                          |
| Brodmann 43                      | 358.0                            | 607.5                     | 793.0                            | 552.0                            | 629.0                     | 758.0                            | .829                          |
| Brodmann 19                      | 5215.5                           | 7398.0                    | 10075.5                          | 4797.0                           | 5249.0                    | 6219.0                           | .126                          |
| Brodmann 47                      | 228.5                            | 337.5                     | 402.0                            | 290.0                            | 337.0                     | 399.0                            | .829                          |
| Brodmann 41                      | 323.0                            | 438.5                     | 585.0                            | 495.0                            | 556.0                     | 684.0                            | .103                          |
| Brodmann 30                      | 19.0                             | 69.5                      | 251.5                            | 56.0                             | 259.0                     | 294.0                            | .183                          |
| Brodmann 22                      | 3732.5                           | 4317.0                    | 5466.0                           | 3926.0                           | 4121.0                    | 4813.0                           | .792                          |
| Brodmann 42                      | 442.0                            | 786.5                     | 1106.5                           | 822.0                            | 1021.0                    | 1208.0                           | .152                          |
| Brodmann 21                      | 1029.5                           | 1771.0                    | 1854.0                           | 1125.0                           | 1272.0                    | 1697.0                           | .300                          |
| Brodmann 38                      | 1006.5                           | 1335.0                    | 1625.5                           | 1116.0                           | 1408.0                    | 1621.0                           | .755                          |
| Brodmann 37                      | 1817.5                           | 2591.0                    | 3891.5                           | 1890.0                           | 2103.0                    | 2594.0                           | .427                          |
| Brodmann 20                      | 1069.0                           | 1861.0                    | 2261.5                           | 1481.0                           | 1715.0                    | 1866.0                           | .648                          |
| Brodmann 32                      | 674.5                            | 1496.5                    | 1780.0                           | 1267.0                           | 1574.0                    | 1788.0                           | .427                          |
| Brodmann 24                      | 668.0                            | 1754.5                    | 1998.5                           | 1514.0                           | 1771.0                    | 2099.0                           | .399                          |
| Brodmann 10                      | 1447.5                           | 2203.0                    | 2866.5                           | 1898.0                           | 2308.0                    | 2764.0                           | .719                          |
| Brodmann 25                      | 64.0                             | 216.0                     | 268.5                            | 220.0                            | 232.0                     | 286.0                            | .427                          |
| Brodmann 11                      | 1462.0                           | 2860.5                    | 3070.0                           | 2253.0                           | 2560.0                    | 2875.0                           | .486                          |
| Brodmann 46                      | 1037.0                           | 1534.0                    | 1719.0                           | 1387.0                           | 1542.0                    | 1760.0                           | .581                          |
| Brodmann 17                      | 1302.5                           | 2157.5                    | 2602.0                           | 2262.0                           | 2483.0                    | 3106.0                           | .126                          |
| Brodmann 18                      | 4321.0                           | 4866.5                    | 5849.0                           | 4408.0                           | 5341.0                    | 6484.0                           | .456                          |
| Brodmann 27                      | 8.0                              | 53.5                      | 141.5                            | 10.0                             | 80.0                      | 115.0                            | .683                          |
| Brodmann 36                      | 31.5                             | 180.0                     | 352.0                            | 128.0                            | 167.0                     | 282.0                            | .867                          |
| Brodmann 35                      | 9.5                              | 69.0                      | 139.5                            | 27.0                             | 83.0                      | 127.0                            | .792                          |
| Brodmann 28                      | 11.0                             | 44.0                      | 69.0                             | 10.0                             | 25.0                      | 43.0                             | .200                          |
| Brodmann 29                      | 5.5                              | 12.0                      | 45.0                             | 8.0                              | 50.0                      | 64.0                             | .183                          |
| Brodmann 26                      | 4.0                              | 10.0                      | 34.0                             | 4.0                              | 32.0                      | 40.0                             | .300                          |
| Medial wall                      | 278.5                            | 941.5                     | 1113.0                           | 739.0                            | 785.0                     | 902.0                            | .683                          |
| Brodmann 33                      | 34.5                             | 185.5                     | 207.0                            | 160.0                            | 20.0                      | 220.0                            | .217                          |

<sup>a</sup> Significant differences ( $P \leq .001$ ) were not detected.

**On-line Table 9: Comparison of the volume distributions of the right hemisphere Brodmann atlas (PALSBI2) regions between the control subjects and the very preterm infants with low-grade IVH**

| Brodmann Atlas (PALSBI2) Regions | Volume (Right Hemisphere)        |                           |                                  |                                  |                           |                                  | P Value (Mann Whitney U Test) |
|----------------------------------|----------------------------------|---------------------------|----------------------------------|----------------------------------|---------------------------|----------------------------------|-------------------------------|
|                                  | Control Subjects                 |                           |                                  | IVH                              |                           |                                  |                               |
|                                  | Percentile 25 (mm <sup>3</sup> ) | Median (mm <sup>3</sup> ) | Percentile 75 (mm <sup>3</sup> ) | Percentile 25 (mm <sup>3</sup> ) | Median (mm <sup>3</sup> ) | Percentile 75 (mm <sup>3</sup> ) |                               |
| Brodmann 8                       | 2075.0                           | 2201.5                    | 2449.5                           | 1688.0                           | 1909.0                    | 2022.0                           | .002                          |
| Brodmann 6                       | 3308.0                           | 3437.0                    | 3795.0                           | 2730.0                           | 3272.0                    | 3328.0                           | .019                          |
| Brodmann 4                       | 4027.0                           | 4315.0                    | 5231.0                           | 3903.0                           | 4239.0                    | 4821.0                           | .399                          |
| Brodmann 9                       | 2880.5                           | 3349.0                    | 3623.5                           | 2135.0                           | 2417.0                    | 3000.0                           | .001 <sup>a</sup>             |
| Brodmann 3                       | 837.5                            | 968.0                     | 1123.5                           | 854.0                            | 927.0                     | 1194.0                           | .943                          |
| Brodmann 1                       | 1392.0                           | 1631.0                    | 1884.5                           | 1394.0                           | 1650.0                    | 2100.0                           | .719                          |
| Brodmann 5                       | 1112.5                           | 1403.0                    | 1441.5                           | 1089.0                           | 1215.0                    | 1428.0                           | .347                          |
| Brodmann 7                       | 4157.0                           | 4623.5                    | 5510.0                           | 3974.0                           | 4303.0                    | 4580.0                           | .256                          |
| Brodmann 2                       | 1842.0                           | 2409.0                    | 2682.5                           | 1798.0                           | 2077.0                    | 2249.0                           | .236                          |
| Brodmann 31                      | 862.0                            | 1482.0                    | 1652.0                           | 1277.0                           | 1442.0                    | 1742.0                           | .683                          |
| Brodmann 40                      | 2145.5                           | 2427.5                    | 2832.5                           | 1689.0                           | 2251.0                    | 2554.0                           | .183                          |
| Brodmann 44                      | 960.0                            | 1202.5                    | 1286.5                           | 713.0                            | 871.0                     | 1066.0                           | .006                          |
| Brodmann 45                      | 685.5                            | 755.5                     | 921.5                            | 416.0                            | 588.0                     | 651.0                            | .009                          |
| Brodmann 23                      | 249.0                            | 716.0                     | 957.5                            | 522.0                            | 857.0                     | 976.0                            | .456                          |
| Brodmann 39                      | 2089.5                           | 2491.0                    | 2792.5                           | 1803.0                           | 2027.0                    | 2363.0                           | .126                          |
| Brodmann 43                      | 605.5                            | 816.0                     | 929.5                            | 614.0                            | 859.0                     | 1003.0                           | .683                          |
| Brodmann 19                      | 5947.0                           | 7223.0                    | 9401.0                           | 5545.0                           | 6231.0                    | 7145.0                           | .373                          |
| Brodmann 47                      | 480.0                            | 530.0                     | 601.5                            | 412.0                            | 473.0                     | 641.0                            | .277                          |
| Brodmann 41                      | 404.0                            | 529.0                     | 697.5                            | 374.0                            | 546.0                     | 628.0                            | .905                          |
| Brodmann 30                      | 65.5                             | 200.5                     | 344.5                            | 261.0                            | 343.0                     | 426.0                            | .059                          |
| Brodmann 22                      | 2946.5                           | 3806.0                    | 4457.5                           | 3182.0                           | 3477.0                    | 4116.0                           | .829                          |
| Brodmann 42                      | 709.5                            | 777.0                     | 940.0                            | 702.0                            | 925.0                     | 1020.0                           | .548                          |
| Brodmann 21                      | 831.0                            | 1501.5                    | 2117.5                           | 1184.0                           | 1446.0                    | 1797.0                           | .943                          |
| Brodmann 38                      | 1302.5                           | 1999.0                    | 2307.0                           | 1571.0                           | 1768.0                    | 1991.0                           | .719                          |
| Brodmann 37                      | 1943.0                           | 2512.5                    | 3194.0                           | 2180.0                           | 2776.0                    | 3523.0                           | .614                          |
| Brodmann 20                      | 866.0                            | 1605.0                    | 1872.5                           | 1538.0                           | 1804.0                    | 1955.0                           | .236                          |
| Brodmann 32                      | 1230.5                           | 1420.0                    | 1625.0                           | 1110.0                           | 1277.0                    | 1700.0                           | .347                          |
| Brodmann 24                      | 1074.0                           | 1656.5                    | 1933.0                           | 1348.0                           | 1683.0                    | 1859.0                           | .581                          |
| Brodmann 10                      | 2671.0                           | 2961.0                    | 3088.0                           | 1829.0                           | 2125.0                    | 2702.0                           | <.001 <sup>a</sup>            |
| Brodmann 25                      | 157.5                            | 244.0                     | 270.0                            | 217.0                            | 241.0                     | 277.0                            | .648                          |
| Brodmann 11                      | 3613.0                           | 3758.0                    | 4272.5                           | 2823.0                           | 3472.0                    | 3663.0                           | .093                          |
| Brodmann 46                      | 1586.0                           | 1869.5                    | 2296.5                           | 1091.0                           | 1369.0                    | 1708.0                           | .004                          |
| Brodmann 17                      | 1194.5                           | 1744.5                    | 2110.5                           | 1671.0                           | 1950.0                    | 2192.0                           | .183                          |
| Brodmann 18                      | 3822.5                           | 5272.0                    | 6693.5                           | 4504.0                           | 4867.0                    | 5491.0                           | .755                          |
| Brodmann 27                      | 13.0                             | 98.5                      | 125.5                            | 55.0                             | 105.0                     | 132.0                            | .548                          |
| Brodmann 36                      | 47.5                             | 137.0                     | 212.5                            | 96.0                             | 144.0                     | 187.0                            | .981                          |
| Brodmann 35                      | 14.0                             | 96.0                      | 132.5                            | 63.0                             | 103.0                     | 117.0                            | .905                          |
| Brodmann 28                      | 11.0                             | 17.5                      | 75.5                             | 12.0                             | 29.0                      | 52.0                             | .581                          |
| Brodmann 29                      | 4.5                              | 28.0                      | 78.5                             | 40.0                             | 76.0                      | 93.0                             | .323                          |
| Brodmann 26                      | 2.5                              | 14.0                      | 45.5                             | 11.0                             | 24.0                      | 38.0                             | .683                          |
| Medial wall                      | 525.5                            | 724.5                     | 909.0                            | 475.0                            | 597.0                     | 700.0                            | .083                          |

<sup>a</sup>Significant differences ( $P \leq .001$ ).

**On-line Table 10: Results of TBSS analysis showing brain clusters (rows) with reduction of FA in very premature infants with low-grade IVH<sup>a</sup>**

| No. of Voxels | P Value | (X, Y, Z) MNI Coordinates at Maximum Significance | White Matter Tracts Involved                                                                                                                                            |
|---------------|---------|---------------------------------------------------|-------------------------------------------------------------------------------------------------------------------------------------------------------------------------|
| 21,817        | .031    | (14, -13, 3)                                      | Anterior thalamic radiation, corticospinal tract, cingulum, forceps minor and major, inferior fronto-occipital fasciculus, longitudinal fasciculus, uncinata fasciculus |
| 271           | .049    | (38, -39, -4)                                     | Anterior thalamic radiation, cingulum, inferior fronto-occipital fasciculus, inferior longitudinal fasciculus                                                           |
| 70            | .050    | (-14, 10, 0)                                      | Anterior thalamic radiation, forceps minor                                                                                                                              |

**Note:**—MNI coordinate indicates Montreal Neurologic Institute atlas coordinates.

<sup>a</sup>For each cluster, its size (number of voxels), the P value and the location of its most significant voxel, and its anatomic location are presented.



**On-line Table 11: Results of functional connectivity analysis showing brain clusters (rows) with decreased brain activity resting-state fMRI in very premature infants with low-grade IVH<sup>a</sup>**

| No. of Voxels | P Value | (X, Y, Z) MNI Coordinates at Maximum P Value | Location                                                |
|---------------|---------|----------------------------------------------|---------------------------------------------------------|
| 223           | .006    | (-66, -12, 18)                               | Postcentral gyrus left, central opercular cortex left   |
| 174           | .02     | (10, -62, 72)                                | Postcentral gyrus right, superior parietal lobule right |

<sup>a</sup> For each cluster, its size (number of voxels), the P value and the location of its most significant voxel, and its anatomic location are presented.
